# Supplementary material for: Evaluation of four calving laws for Antarctic ice shelves
Source: Copernicus journal article supplement (doi:10.5194/tc-17-4889-2023), 2023-11-21
Supplement: Supplementary file 1 [file tc-17-4889-2023-supplement.pdf]

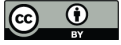

*Supplement of*

## **Evaluation of four calving laws for Antarctic ice shelves**

**Joel A. Wilner et al.**

*Correspondence to:* Joel A. Wilner ([joel.a.wilner.gr@dartmouth.edu](mailto:joel.a.wilner.gr@dartmouth.edu))

The copyright of individual parts of the supplement might differ from the article licence.

## Amery Ice Shelf

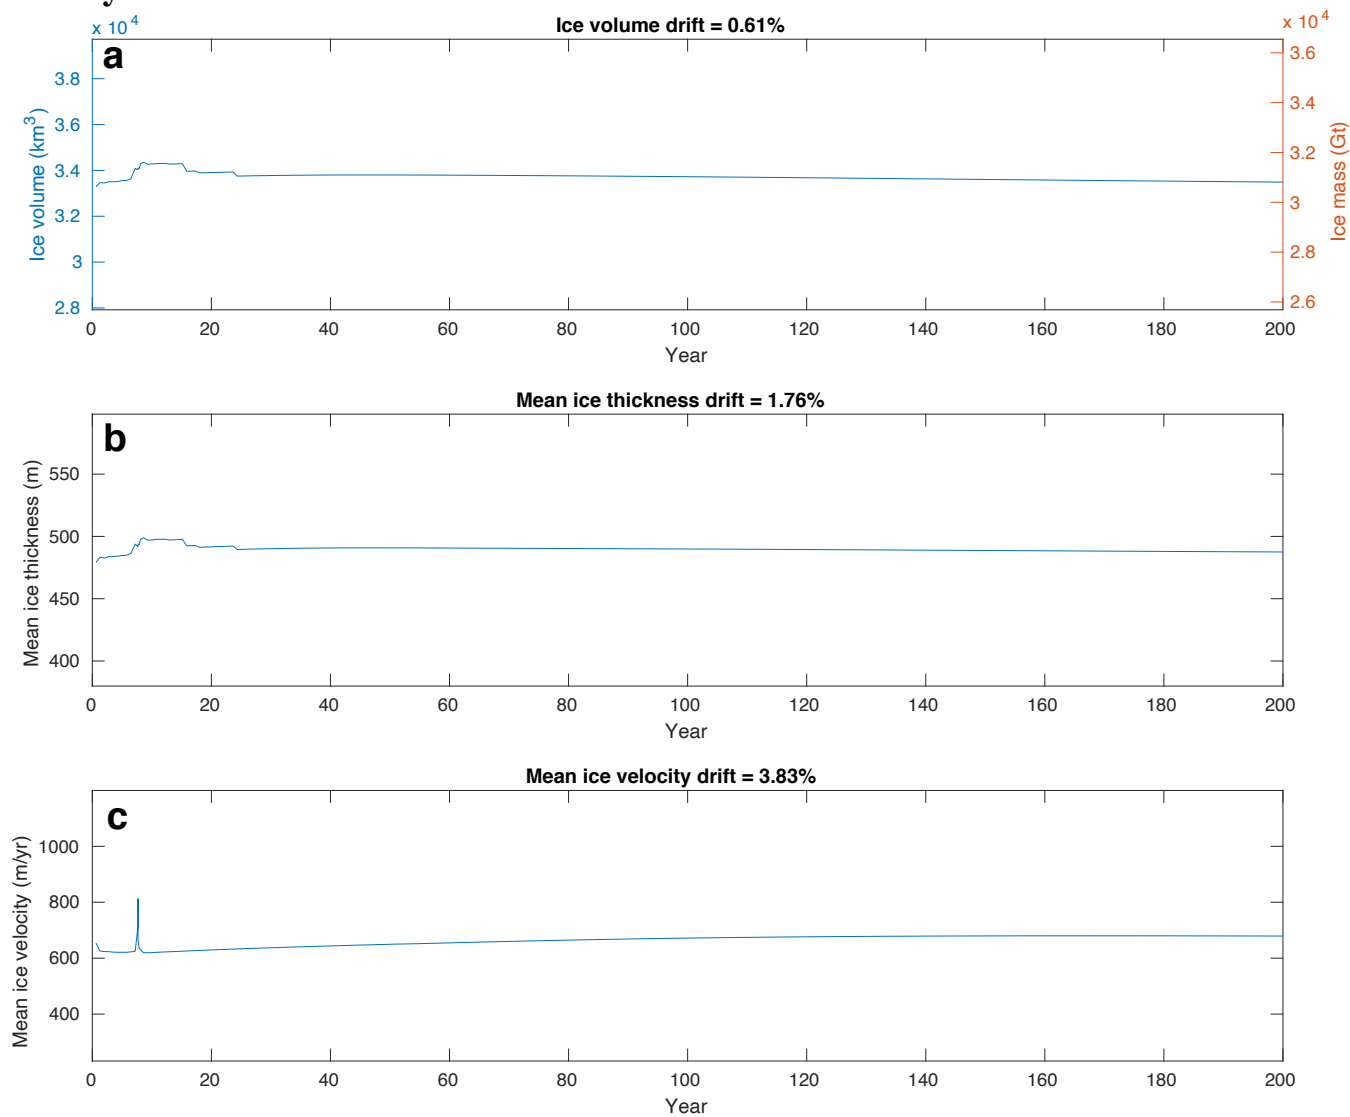

**Figure S1.** Calculated drift in (a) floating ice volume, (b) mean floating ice thickness, and (c) mean floating ice velocity for Amery Ice Shelf over the 200-year simulation period with a fixed ice front.

## Denman Ice Shelf

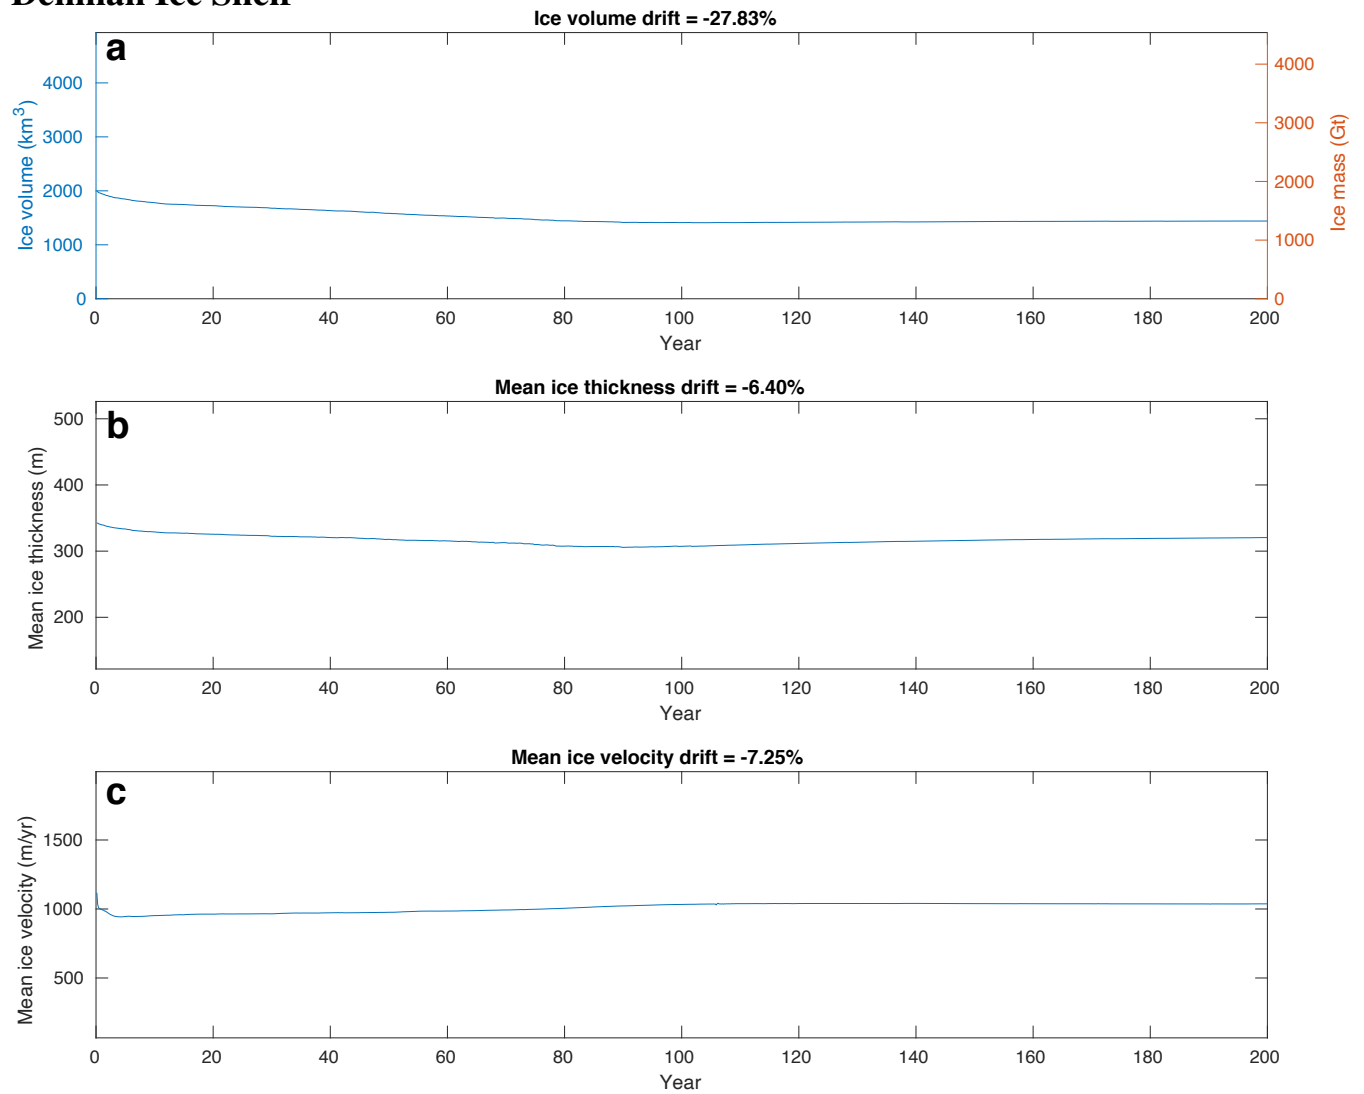

**Figure S2.** Calculated drift in (a) floating ice volume, (b) mean floating ice thickness, and (c) mean floating ice velocity for Denman Ice Shelf over the 200-year simulation period with a fixed ice front.

## Filchner Ice Shelf

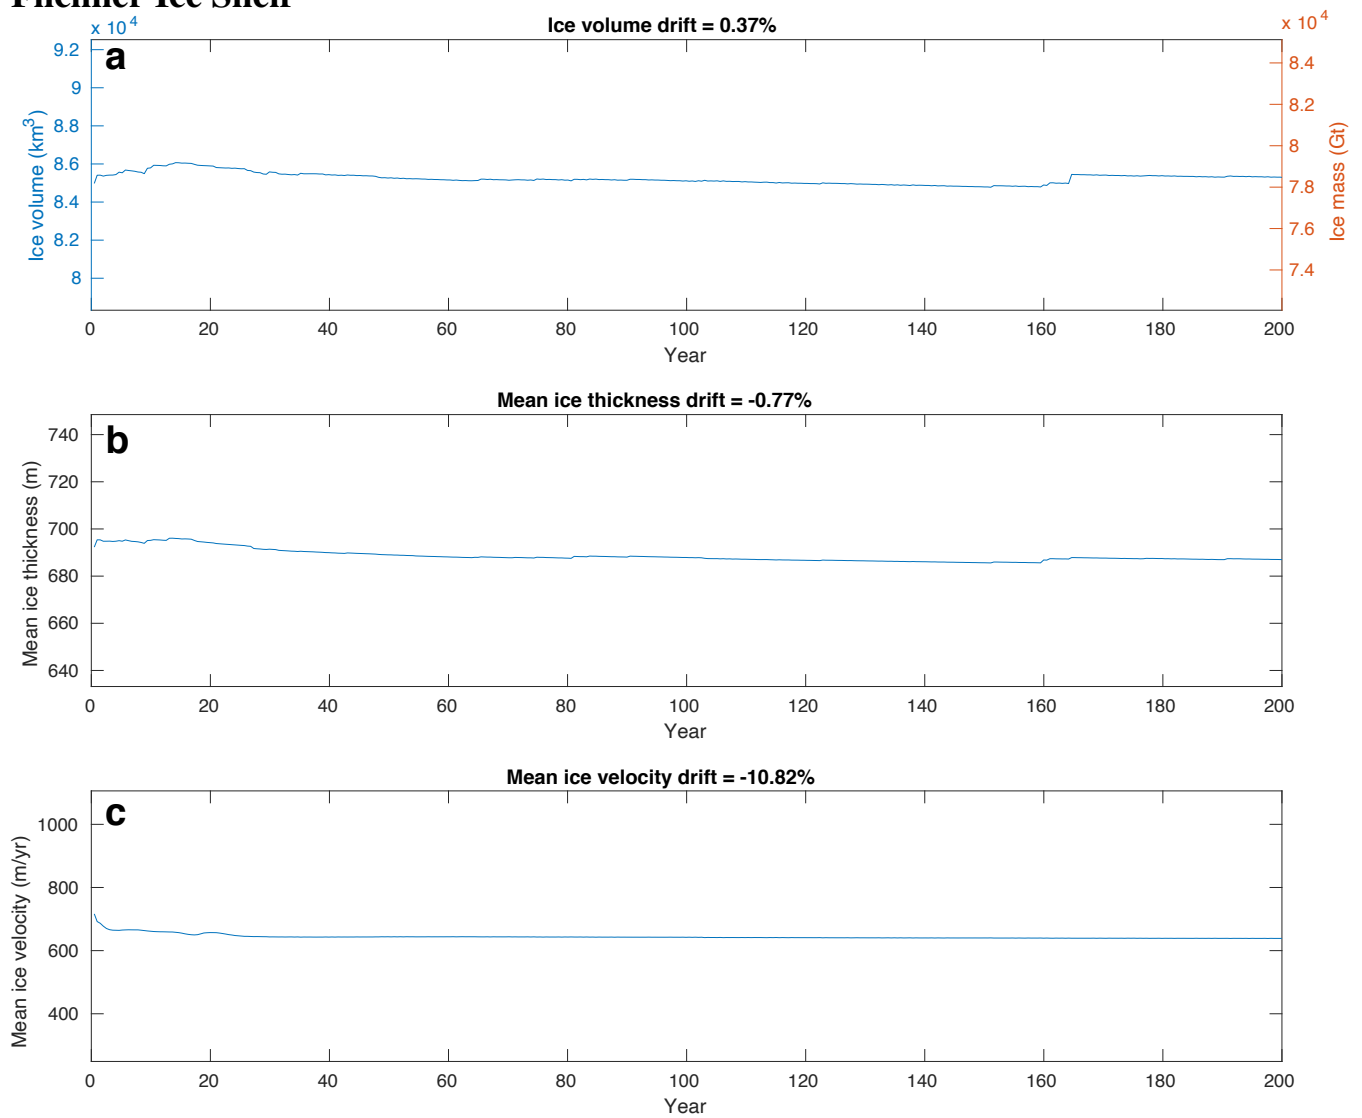

**Figure S3.** Calculated drift in (a) floating ice volume, (b) mean floating ice thickness, and (c) mean floating ice velocity for Filchner Ice Shelf over the 200-year simulation period with a fixed ice front.

## Larsen C Ice Shelf

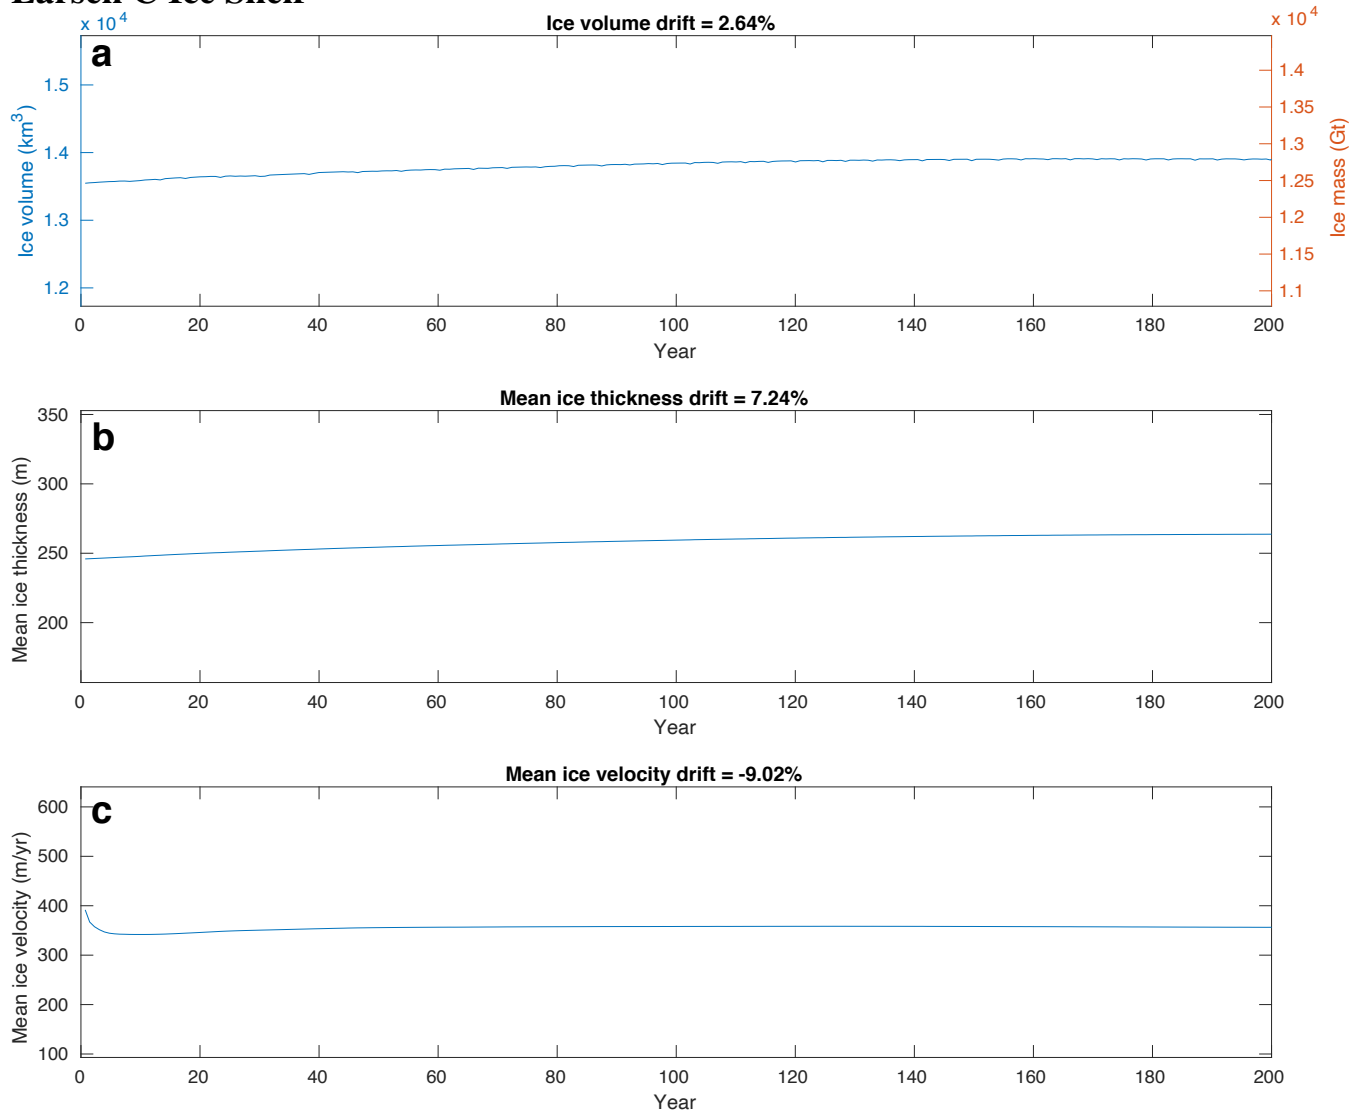

**Figure S4.** Calculated drift in (a) floating ice volume, (b) mean floating ice thickness, and (c) mean floating ice velocity for Larsen C Ice Shelf over the 200-year simulation period with a fixed ice front.

## Pine Island Ice Shelf

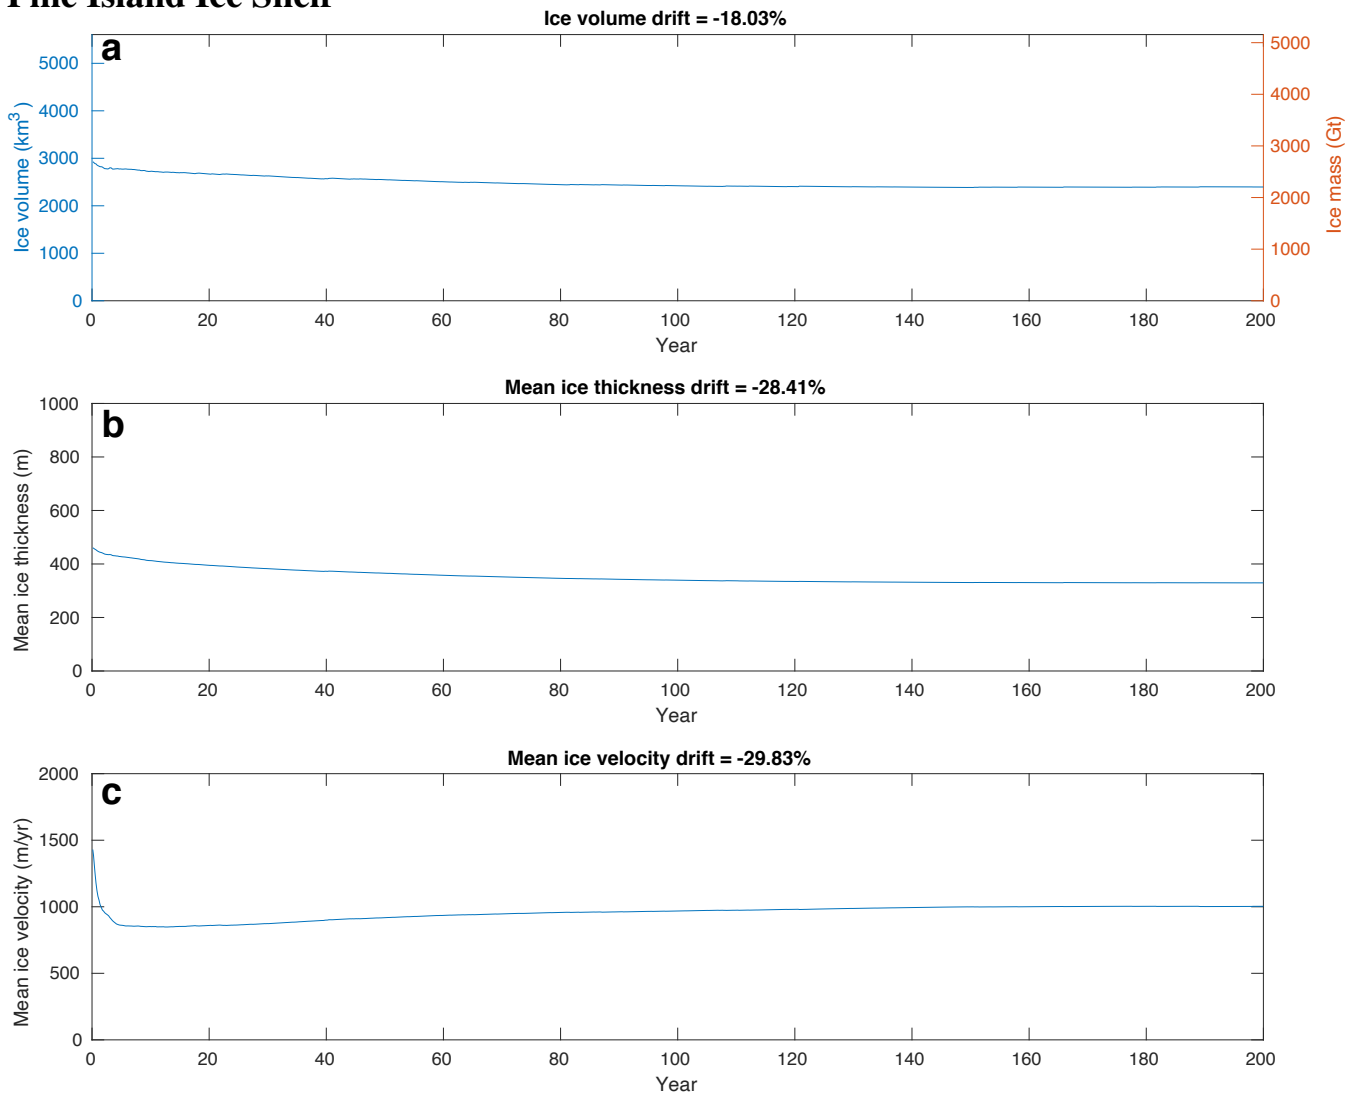

**Figure S5.** Calculated drift in (a) floating ice volume, (b) mean floating ice thickness, and (c) mean floating ice velocity for Pine Island Ice Shelf over the 200-year simulation period with a fixed ice front.

## Ronne Ice Shelf

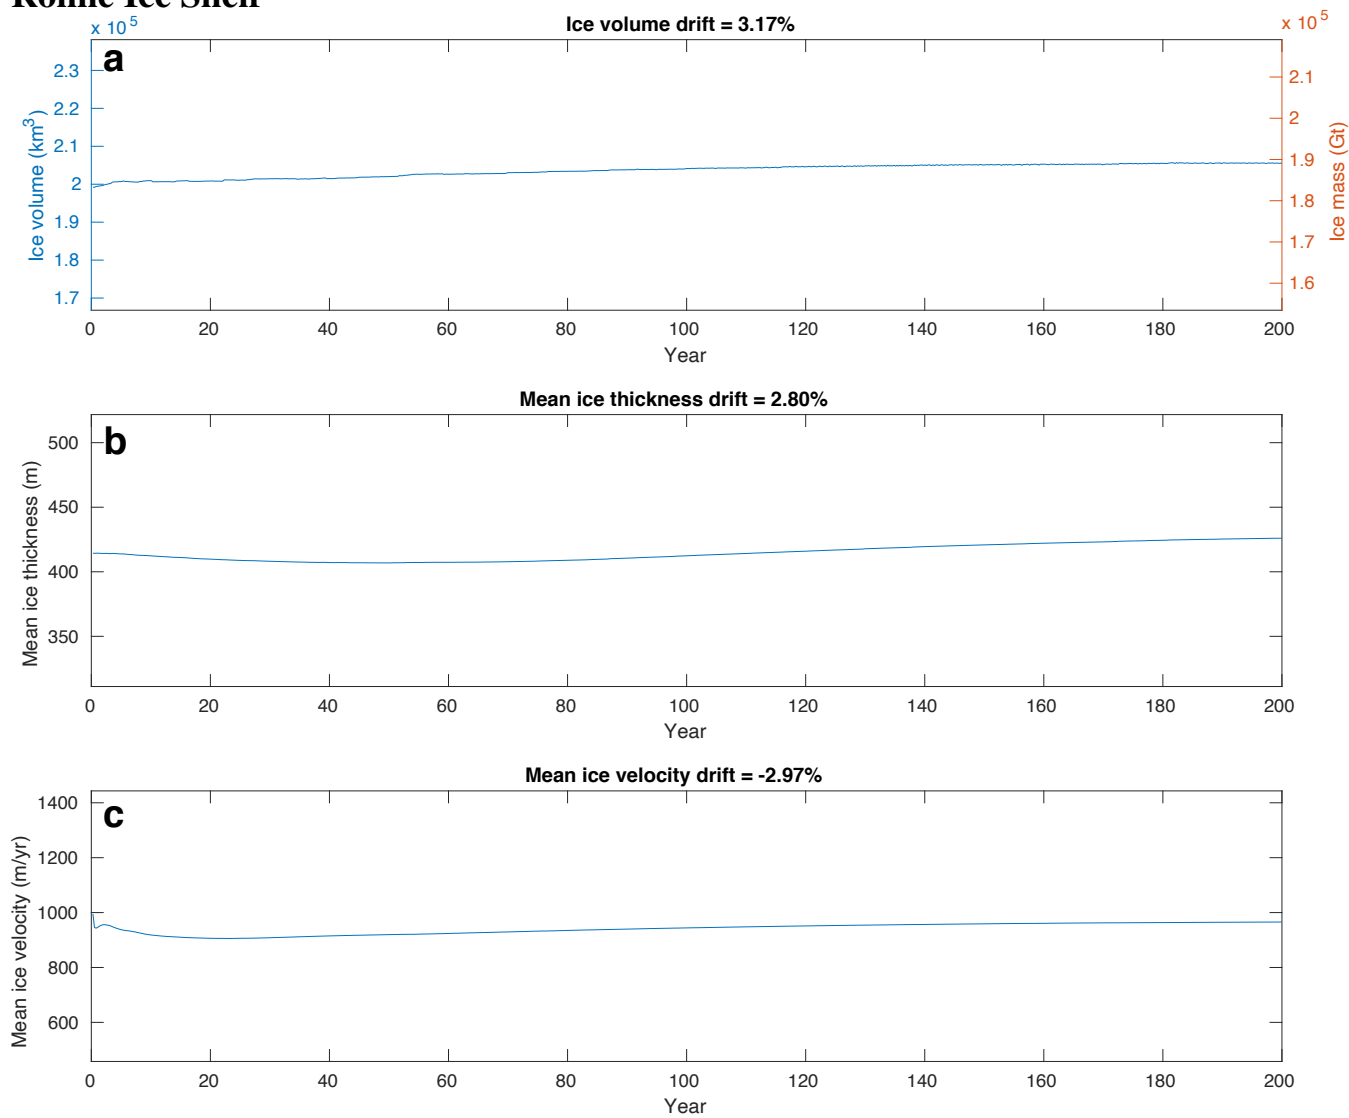

**Figure S6.** Calculated drift in (a) floating ice volume, (b) mean floating ice thickness, and (c) mean floating ice velocity for Ronne Ice Shelf over the 200-year simulation period with a fixed ice front.

## Ross Ice Shelf

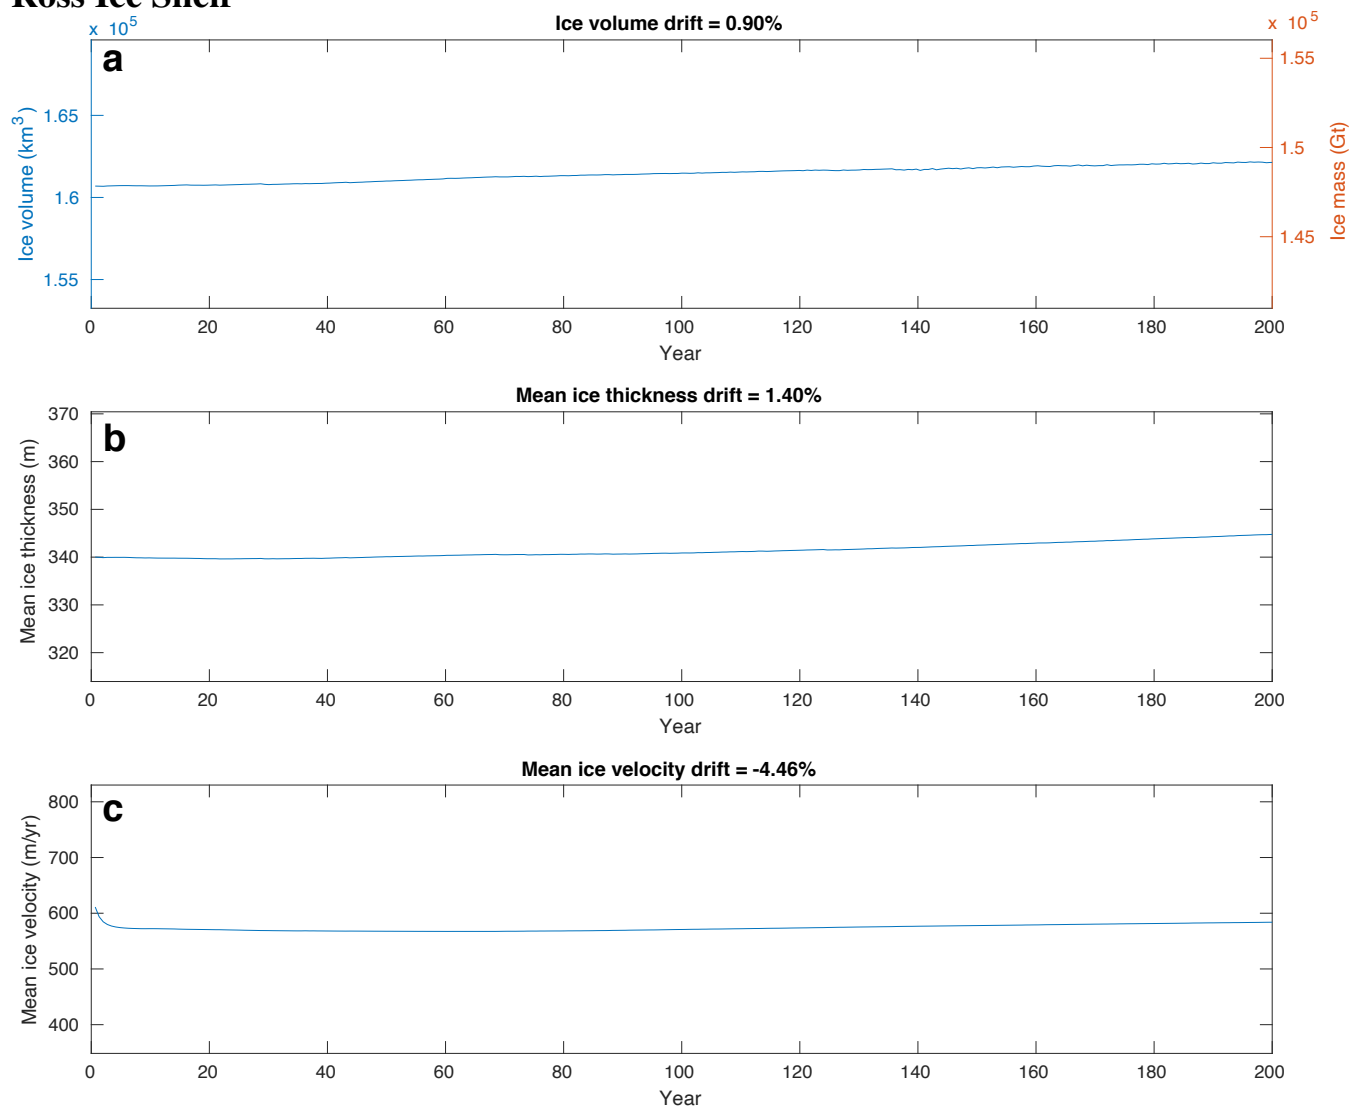

**Figure S7.** Calculated drift in (a) floating ice volume, (b) mean floating ice thickness, and (c) mean floating ice velocity for Ross Ice Shelf over the 200-year simulation period with a fixed ice front.



## Shackleton Ice Shelf

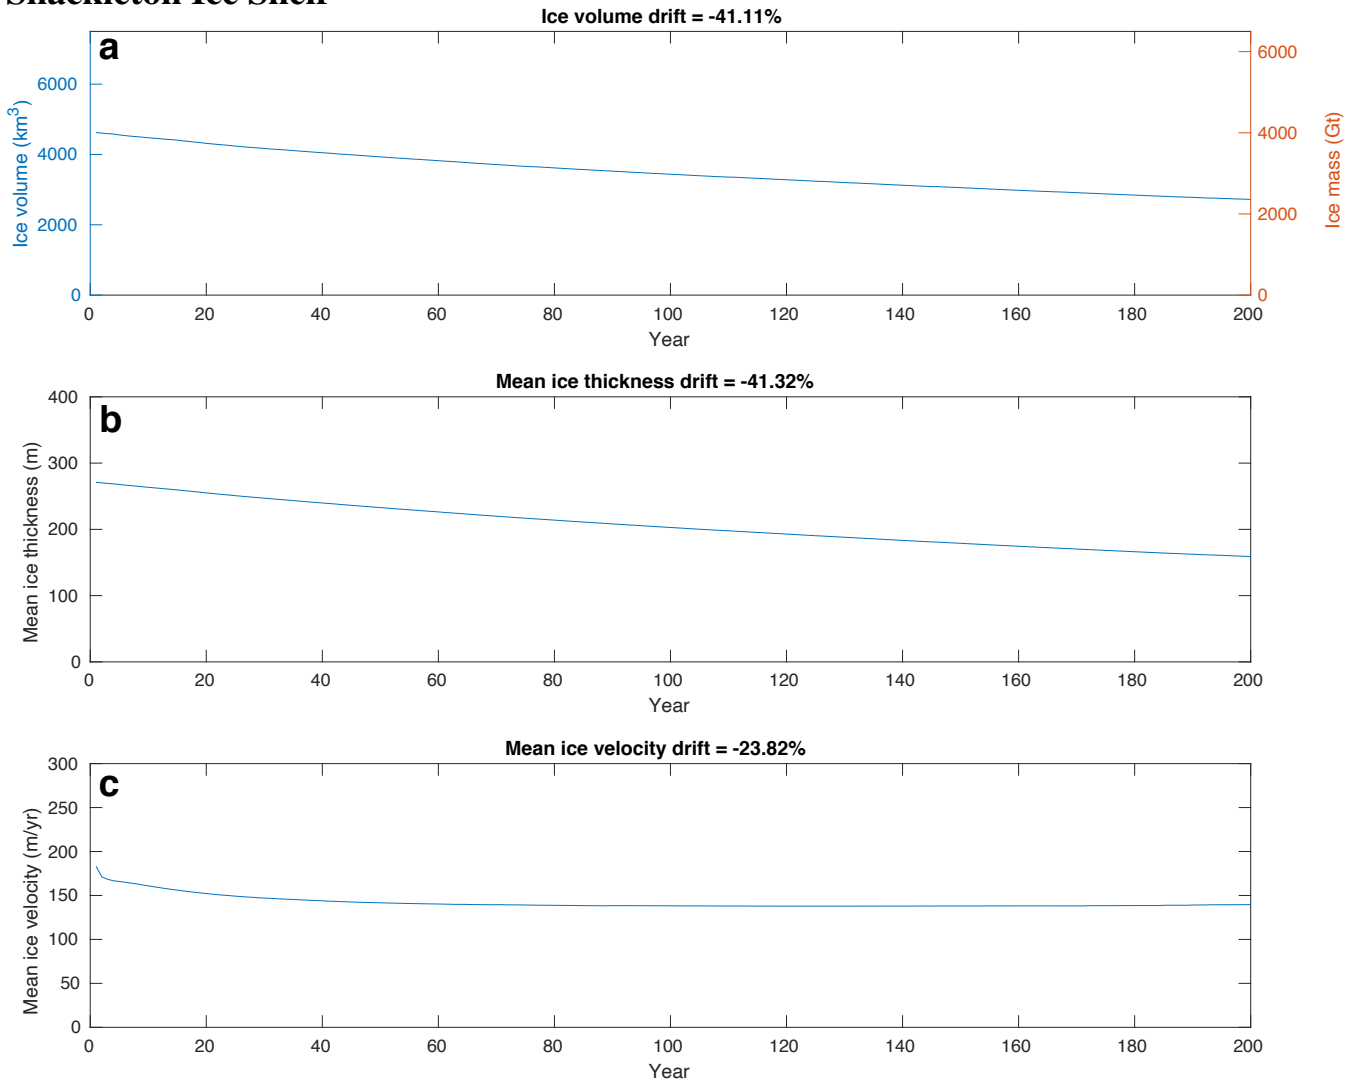

**Figure S8.** Calculated drift in (a) floating ice volume, (b) mean floating ice thickness, and (c) mean floating ice velocity for Shackleton Ice Shelf over the 200-year simulation period with a fixed ice front.

## Thwaites Ice Shelf

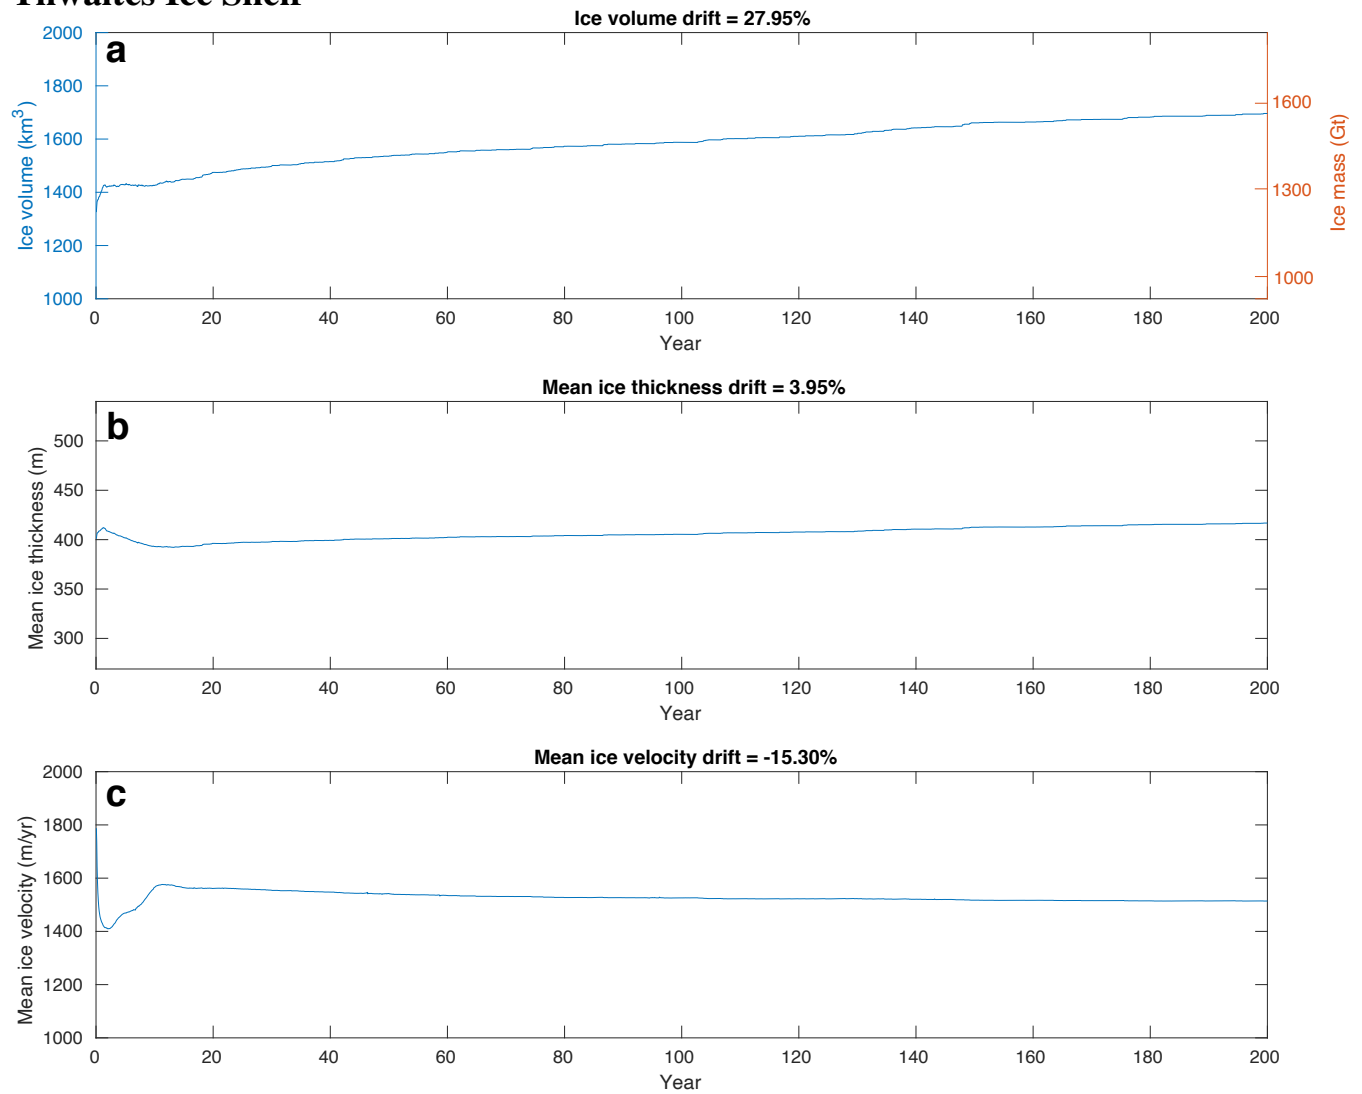

**Figure S9.** Calculated drift in (a) floating ice volume, (b) mean floating ice thickness, and (c) mean floating ice velocity for Thwaites Ice Shelf over the 200-year simulation period with a fixed ice front.

## Totten Ice Shelf

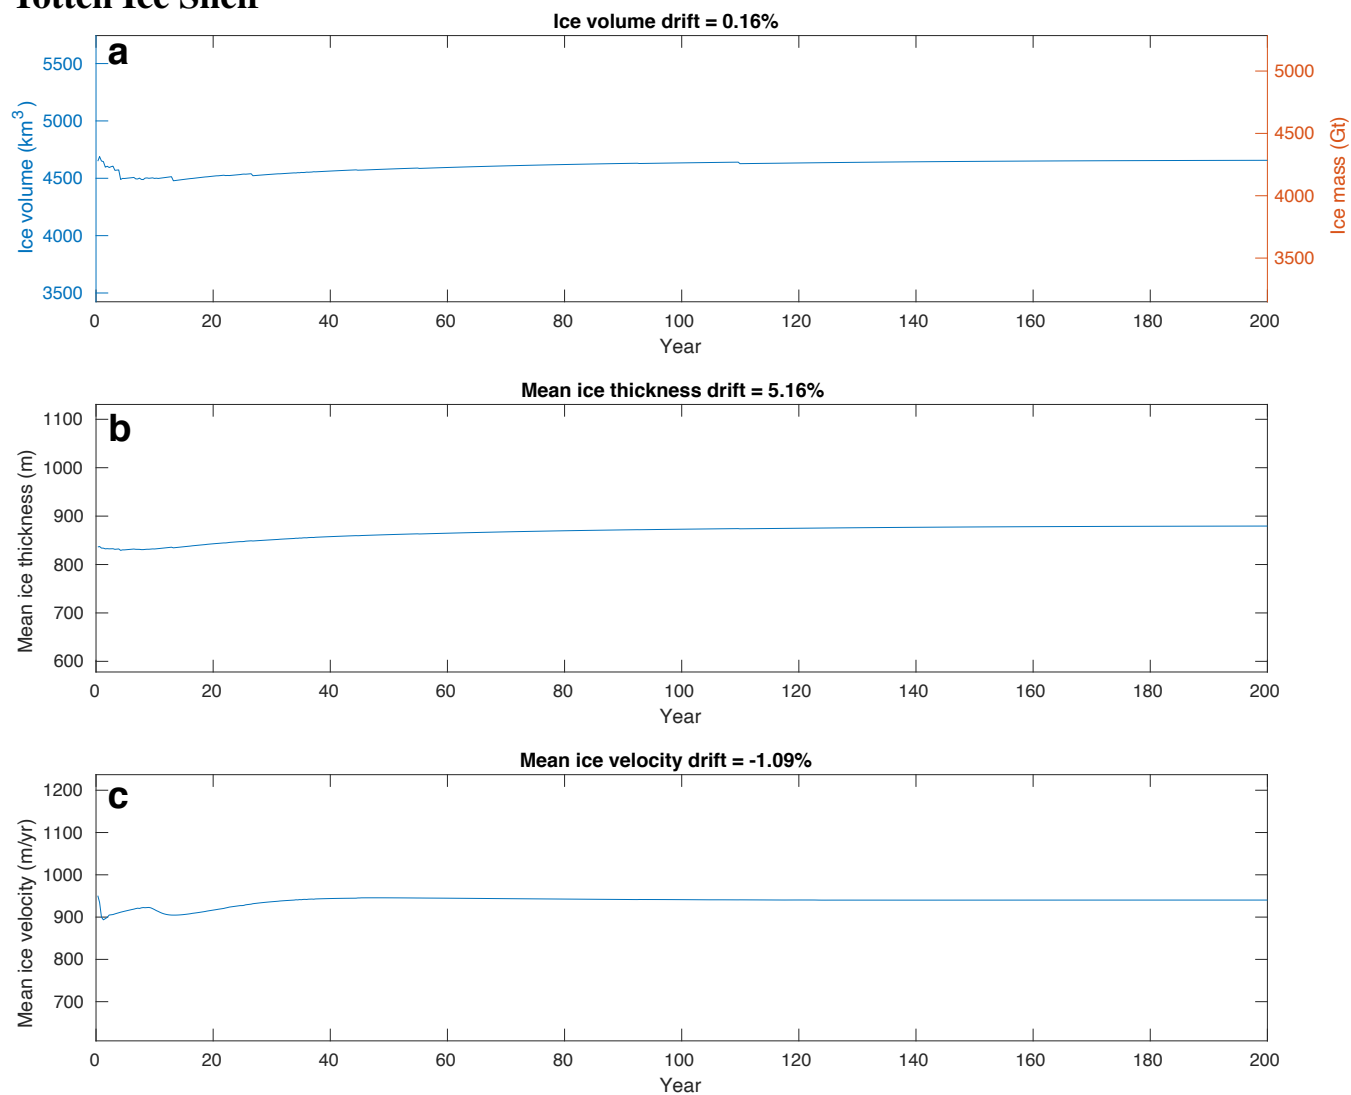

**Figure S10.** Calculated drift in (a) floating ice volume, (b) mean floating ice thickness, and (c) mean floating ice velocity for Totten Ice Shelf over the 200-year simulation period with a fixed ice front.

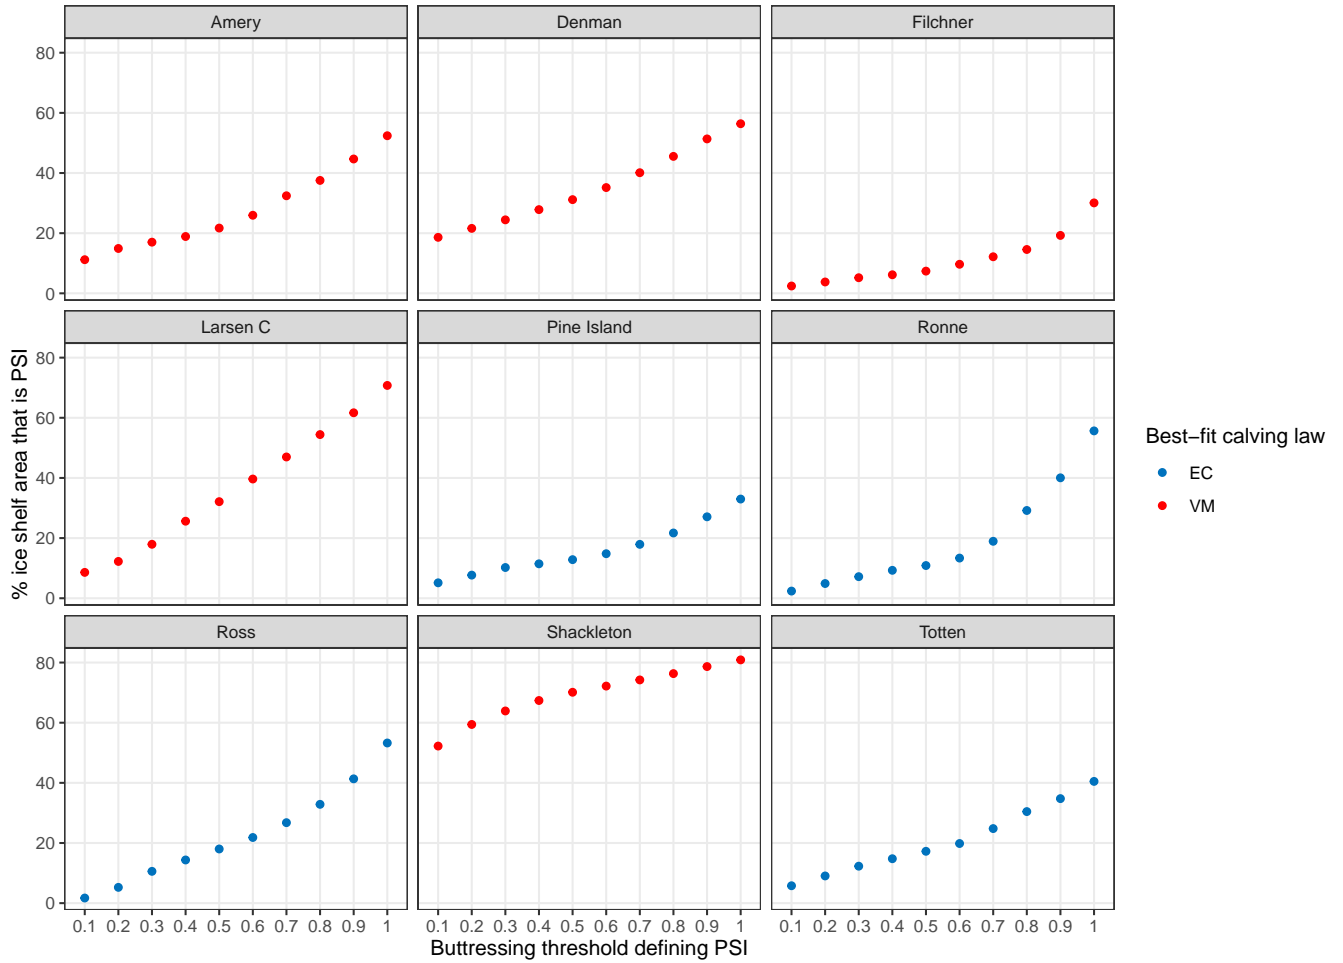

**Figure S11.** PSI fraction grouped by ice shelf for different buttressing thresholds defining PSI with eventual best-fit calving law (EC or VM) indicated. Here, PSI fraction is computed just after model initialization ( $t=0$  yrs). Thwaites is excluded because it is not fit best by either EC or VM.

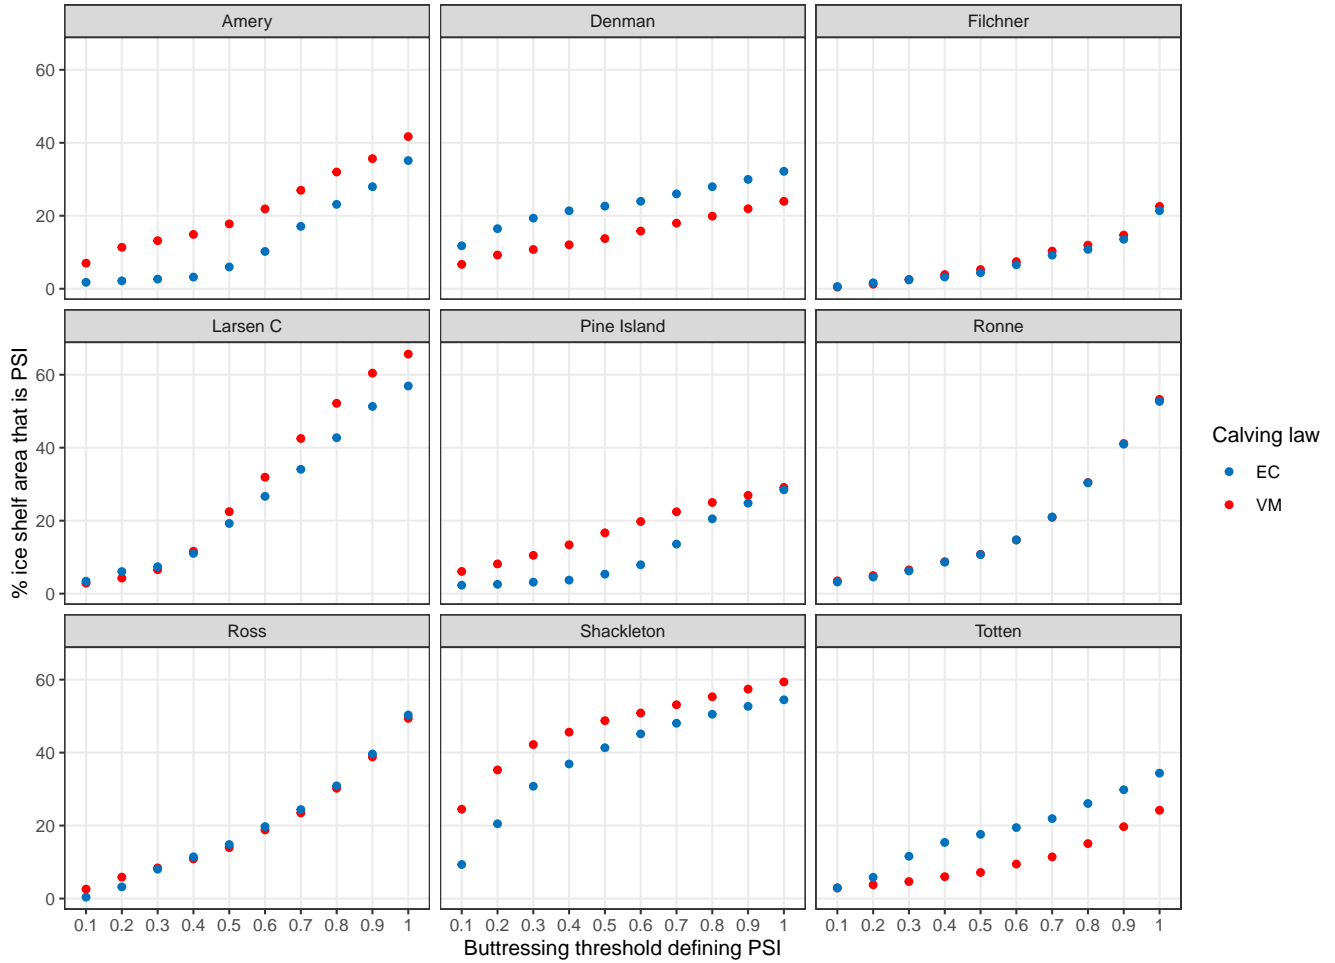

**Figure S12.** PSI fraction at the end of the simulation period ( $t=200$  yrs) grouped by ice shelf for different buttressing thresholds defining PSI with EC and VM alternately applied to the model. Thwaites is excluded because it is not part of the EC versus VM comparison.
